# Supplementary material for: How to perform RT-qPCR accurately in plant species? A case study on flower colour gene expression in an azalea (Rhododendron simsii hybrids) mapping population
Source: PubMed Central journal article supplement (PMC3698002; doi:10.1186/1471-2199-14-13), 2013-06-24
Supplement: 1471-2199-14-13-S1.pdf [file 1471-2199-14-13-S1.pdf]

| Sample     | Assay | Colour | RNA concentration (ng/μl) |        | A260/280 |      | A260/230 |      |
|------------|-------|--------|---------------------------|--------|----------|------|----------|------|
| Replicates |       |        | a                         | b      | a        | b    | a        | b    |
| 1          | 2     | 0      | 9.23*                     | 69.93  | 1.85     | 1.98 | 2.4      | 2.22 |
| 3          | 2     | 1      | 210.07*                   | 234.54 | 2.08     | 1.97 | 2.18     | 2.29 |
| 6          | 2     | 1      | 5.16*                     | 4.98   | 1.45     | 1.52 | 1.27     | 1.05 |
| 7          | 2     | 2      | 66.31                     | 64.36* | 1.97     | 1.99 | 2.57     | 2.45 |
| 9          | 2     | 2      | 48.67                     | 77.32  | 2.06     | 1.98 | 2.41     | 2.23 |
| 10         | 2     | 0      | 1.74                      | 2.52   | 1.43     | 1.34 | 0.82     | 0.82 |
| 12         | 2     | 1      | 10.79*                    | 57.79  | 1.97     | 2.07 | 1.74     | 2.21 |
| 13         | 2     | 2      | 1.64                      | 4.62   | 6.02     | 2.31 | 0.80     | 2.82 |
| 14         | 2     | 0      | 12.93                     | 163.94 | 1.78     | 1.94 | 1.81     | 2.46 |
| 16         | 2     | 0      | 179.56*                   | 165.45 | 2.02     | 1.99 | 2.38     | 2.42 |
| 17         | 2     | 1      | 171.12*                   | 145.57 | 1.98     | 1.92 | 2.33     | 2.52 |
| 18         | 2     | 1      | 27.3*                     | 44.92  | 1.84     | 1.91 | 1.94     | 2.43 |
| 19         | 2     | 3      | 26.92                     | 46.27  | 1.90     | 1.63 | 1.85     | 0.73 |
| 21         | 2     | 0      | 5.32                      | 29.61  | 1.62     | 1.87 | 1.70     | 1.84 |
| 22         | 2     | 3      | 1.80                      | 1.86   | 1.03     | 0.95 | 1.28     | 1.07 |
| 24         | 2     | 0      | 36.09                     | 167.01 | 1.92     | 1.98 | 2.57     | 2.45 |
| 25         | 2     | 1      | 9.91                      | 24.03  | 2.75     | 1.93 | 3.02     | 2.03 |
| 26         | 2     | 2      | 10.82                     | 3.69   | 1.60     | 1.17 | 1.45     | 1.34 |
| 28         | 2     | 1      | 83.81                     | 6.00   | 1.96     | 2.15 | 2.33     | 1.01 |
| 29         | 2     | 2      | 10.73                     | 1.86*  | 1.76     | 1.31 | 1.56     | 0.84 |
| 32         | 2     | 2      | 5.38*                     | 9.56   | 1.31     | 1.64 | 0.84     | 1.13 |
| 33         | 2     | 0      | 26.25*                    | 4.21   | 1.98     | 1.5  | 1.76     | 1.16 |
| 36         | 2     | 0      | 7.85                      | 4.81   | 1.87     | 1.35 | 1.73     | 1.16 |
| 38         | 2     | 2      | 15.24*                    | 29.58  | 2.10     | 2.01 | 2.32     | 2.45 |
| 48         | 3     | 0      | 10.04                     | 6.01   | 2.16     | 1.92 | 2.00     | 1.52 |
| 50         | 3     | 1      | 85.25                     | 95.19  | 2.06     | 2.02 | 2.40     | 2.51 |
| 57         | 3     | 1      | 26.18                     | 8.59   | 1.88     | 1.97 | 1.96     | 2.20 |
| 58         | 3     | 1      | 52.53                     | 92.49  | 2.10     | 2.16 | 2.23     | 2.00 |
| 59         | 3     | 1      | 6.17                      | 3.04   | 1.45     | 1.90 | 2.43     | 2.14 |
| 66         | 2     | 2      | 141.04                    | 198.04 | 1.97     | 1.96 | 2.25     | 2.41 |
| 67         | 2     | 2      | 18.46                     | 59.32  | 1.74     | 2.08 | 1.66     | 2.29 |
| 68         | 3     | 1      | 15.24                     | 29.58  | 2.10     | 2.01 | 2.32     | 2.45 |
| 71         | 3     | 2      | 6.83                      | 8.06   | 1.79     | 1.53 | 2.19     | 1.09 |
| 73         | 3     | 2      | 4.86                      | 10.68  | 1.93     | 1.64 | 1.23     | 2.20 |
| 79         | 3     | 2      | 43.84                     | 23.99  | 1.89     | 1.85 | 2.33     | 2.48 |
| 80         | 3     | 0      | 95.41                     | 183.87 | 1.94     | 1.99 | 2.40     | 2.42 |
| 83         | 2     | 1      | 102.22                    | 326.74 | 1.89     | 2.04 | 1.97     | 2.24 |
| 84         | 3     | 0      | 2.34                      | 1.67   | 1.18     | 1.52 | 0.76     | 0.59 |
| 95         | 3     | 0      | 6.44                      | 15.09  | 1.41     | 1.79 | 1.48     | 1.83 |
| 100        | 3     | 0      | 130.47                    | 33.89  | 1.92     | 1.87 | 2.36     | 2.20 |
| 102        | 1     | 3      | 22.43                     | 37.13  | 2.16     | 2.14 | 1.93     | 2.01 |
| 104        | 3     | 1      | 109.97                    | 135.25 | 1.87     | 1.88 | 2.56     | 2.57 |
| 108        | 3     | 1      | 11.73                     | 41.94  | 2.04     | 1.96 | 1.93     | 2.31 |
| 109        | 3     | 1      | 91.62                     | 65.12  | 1.97     | 1.94 | 2.33     | 2.17 |

| Sample     | Assay | Colour | RNA concentration (ng/μl) |        | A260/280 |      | A260/230 |      |
|------------|-------|--------|---------------------------|--------|----------|------|----------|------|
| Replicates |       |        | a                         | b      | a        | b    | a        | b    |
| 111        | 3     | 0      | 5.83                      | 5.05   | 1.62     | 2.13 | 2.11     | 2.23 |
| 117        | 3     | 0      | 16.65                     | 13.94  | 1.96     | 1.83 | 1.78     | 1.31 |
| 121        | 1     | 3      | 100.32                    | 116.79 | 2.00     | 2.08 | 2.37     | 2.33 |
| 131        | 1     | 1      | 14.31                     | 7.03   | 2.16     | 2.28 | 1.64     | 1.14 |
| 132        | 1     | 1      | 36.61                     | 6.37   | 1.93     | 2.94 | 2.34     | 1.60 |
| 153        | 1     | 0      | 18.55                     | 52.87  | 2.12     | 1.93 | 1.91     | 2.43 |
| 158        | 1     | 0      | 36.76                     | 40.27  | 2.02     | 1.89 | 1.97     | 2.17 |
| 161        | 1     | 3      | 77.25                     | 45.67  | 1.97     | 1.96 | 2.29     | 1.94 |
| 164        | 1     | 0      | 19.39                     | 32.89  | 1.96     | 1.92 | 1.67     | 1.72 |
| 168        | 2     | 0      | 394.47*                   | 30.89  | 2.01     | 2.13 | 2.33     | 1.87 |
| 173        | 3     | 2      | 20.68                     | 18.62  | 1.67     | 1.87 | 2.17     | 2.51 |
| 174        | 3     | 0      | 4.31                      | 10.38  | 1.51     | 1.65 | 2.08     | 1.94 |
| 176        | 3     | 0      | 35.19                     | 71.20  | 2.01     | 2.05 | 2.19     | 2.17 |
| 179        | 1     | 0      | 25.42                     | 9.23   | 1.87     | 2.00 | 2.07     | 1.40 |
| 180        | 2     | 1      | 73.97*                    | 54.17  | 2.01     | 1.90 | 2.36     | 1.18 |
| 185        | 1     | 2      | 150.99                    | 413.35 | 1.96     | 1.93 | 2.44     | 2.42 |
| 190        | 1     | 3      | 128.43                    | 164.60 | 2.06     | 1.97 | 2.21     | 2.44 |
| 191        | 1     | 1      | 8.74                      | 23.93  | 2.51     | 2.10 | 1.63     | 1.91 |
| 197        | 1     | 2      | 32.64                     | 52.24  | 1.99     | 1.96 | 1.88     | 2.21 |
| 201        | 1     | 2      | 83.74                     | 37.29  | 2.04     | 2.11 | 1.87     | 2.17 |
| 209        | 1     | 2      | 41.03                     | 56.71  | 2.08     | 2.03 | 2.12     | 2.23 |
| 213        | 1     | 0      | 124.53                    | 26.00  | 1.91     | 1.93 | 2.42     | 2.12 |
| 220        | 1     | 1      | 18.78                     | 19.16  | 2.10     | 1.94 | 2.08     | 1.50 |
| 234        | 1     | 2      | 246.78                    | 90.88  | 2.04     | 1.95 | 2.14     | 2.34 |
| 236        | 1     | 3      | 575.34                    | 704.98 | 2.05     | 2.00 | 2.33     | 2.41 |
| 250        | 1     | 1      | 30.36                     | 17.58  | 2.01     | 2.26 | 2.28     | 1.94 |
| 98-13-4    | 1     | 3      | 155.57                    | 239.58 | 1.94     | 2.03 | 2.44     | 2.40 |
| V151       | 1     | 3      | 185.42                    | 221.13 | 2.04     | 1.97 | 2.41     | 2.42 |
