# Supplementary material for: How to perform RT-qPCR accurately in plant species? A case study on flower colour gene expression in an azalea (Rhododendron simsii hybrids) mapping population
Source: PubMed Central journal article supplement (PMC3698002; doi:10.1186/1471-2199-14-13), 2013-06-24
Supplement: 1471-2199-14-13-S3.pdf [file 1471-2199-14-13-S3.pdf]

| Gene        | Assay | Slope | E    | SD (E) |
|-------------|-------|-------|------|--------|
| <i>ANS</i>  | 1     | -3.39 | 0.97 | 0.0017 |
|             | 2     | -3.51 | 0.93 | 0.0012 |
|             | 3     | -3.52 | 0.92 | 0.0027 |
| <i>CHS</i>  | 1     | -3.38 | 0.97 | 0.0037 |
|             | 2     | -3.46 | 0.94 | 0.0019 |
|             | 3     | -3.46 | 0.94 | 0.0010 |
| <i>DFR</i>  | 1     | -4.08 | 0.76 | 0.0025 |
|             | 2     | -4.34 | 0.70 | 0.0028 |
|             | 3     | -4.34 | 0.70 | 0.0028 |
| <i>F3H</i>  | 1     | -3.42 | 0.96 | 0.0011 |
|             | 2     | -3.46 | 0.94 | 0.0025 |
|             | 3     | -3.47 | 0.94 | 0.0020 |
| <i>F3'H</i> | 1     | -3.90 | 0.81 | 0.0034 |
|             | 2     | -3.90 | 0.81 | 0.0034 |
|             | 3     | -3.78 | 0.84 | 0.0048 |
| <i>FLS</i>  | 1     | -3.37 | 0.98 | 0.0022 |
|             | 2     | -3.45 | 0.95 | 0.0034 |
|             | 3     | -3.50 | 0.93 | 0.0092 |
| HK5         | 1     | -3.43 | 0.96 | 0.0021 |
|             | 2     | -3.42 | 0.96 | 0.0025 |
|             | 3     | -3.61 | 0.89 | 0.0029 |
| HK129       | 1     | -3.48 | 0.94 | 0.0019 |
|             | 2     | -3.63 | 0.89 | 0.0044 |
|             | 3     | -3.89 | 0.81 | 0.0042 |
