# Supplementary material for: How to perform RT-qPCR accurately in plant species? A case study on flower colour gene expression in an azalea (Rhododendron simsii hybrids) mapping population
Source: PubMed Central journal article supplement (PMC3698002; doi:10.1186/1471-2199-14-13), 2013-06-24
Supplement: 1471-2199-14-13-S4.pdf [file 1471-2199-14-13-S4.pdf]

| Sample | Individual analysis (per assay) |        |        |        |       |        | Analysis on total dataset (72 samples) |        |        |        |        |        |
|--------|---------------------------------|--------|--------|--------|-------|--------|----------------------------------------|--------|--------|--------|--------|--------|
|        | ANS                             | CHS    | DFR    | F3H    | F3'H  | FLS    | ANS                                    | CHS    | DFR    | F3H    | F3'H   | FLS    |
| 102    | 0.451                           | -0.495 | -0.277 | -0.221 | 0.925 | -0.193 | 0.337                                  | -0.209 | -0.119 | 0.021  | 0.061  | -0.083 |
| 121    | 0.287                           | -0.420 | -0.394 | -0.194 | 0.911 | -0.224 | 0.178                                  | -0.135 | -0.206 | 0.049  | 0.056  | -0.112 |
| 131    | 0.336                           | -0.067 | 0.104  | -0.161 | 0.919 | 0.022  | 0.104                                  | 0.090  | 0.188  | -0.034 | 0.028  | 0.006  |
| 132    | 0.233                           | -0.354 | -0.327 | -0.287 | 0.689 | -0.091 | 0.206                                  | 0.013  | -0.010 | 0.044  | -0.004 | 0.099  |
| 153    | 0.273                           | -0.291 | -0.338 | -0.261 | 0.961 | -0.096 | 0.082                                  | -0.089 | -0.207 | -0.095 | 0.045  | -0.068 |
| 158    | 0.085                           | -0.046 | -0.108 | -0.179 | 1.454 | 0.143  | -0.122                                 | 0.131  | -0.030 | -0.036 | 0.451  | 0.148  |
| 161    | 0.164                           | -0.092 | 0.126  | -0.150 | 1.123 | 0.064  | -0.084                                 | 0.046  | 0.081  | -0.048 | 0.098  | 0.031  |
| 164    | 0.180                           | -0.108 | 0.112  | -0.149 | 1.275 | 0.068  | -0.021                                 | 0.078  | 0.154  | 0.001  | 0.304  | 0.081  |
| 179    | 0.390                           | -0.174 | -0.032 | -0.318 | 0.909 | -0.037 | 0.222                                  | 0.050  | 0.118  | -0.123 | 0.065  | 0.013  |
| 185    | 0.349                           | -0.274 | -0.090 | -0.171 | 1.159 | -0.234 | 0.241                                  | 0.011  | 0.016  | 0.073  | 0.247  | -0.118 |
| 190    | 0.149                           | -0.339 | -0.059 | -0.363 | 1.135 | 0.026  | -0.030                                 | -0.127 | 0.025  | -0.186 | 0.198  | 0.062  |
| 191    | 0.363                           | 0.342  | 0.582  | 0.245  | 1.395 | 0.323  | 0.207                                  | 0.567  | 0.609  | 0.434  | 0.473  | 0.379  |

Assay 1

| Sample  | Individual analysis (per assay) |        |        |        |        |        | Analysis on total dataset (72 samples) |        |        |        |        |        |        |
|---------|---------------------------------|--------|--------|--------|--------|--------|----------------------------------------|--------|--------|--------|--------|--------|--------|
|         | ANS                             | CHS    | DFR    | F3H    | F3'H   | FLS    | ANS                                    | CHS    | DFR    | F3H    | F3'H   | FLS    |        |
| 197     | -0.547                          | -0.475 | -0.422 | -0.620 | 0.959  | -0.249 | -0.695                                 | -0.243 | -0.254 | -0.417 | 0.066  | -0.191 |        |
| 201     | 0.252                           | 0.155  | 0.334  | -0.001 | 1.299  | 0.093  | 0.105                                  | 0.391  | 0.335  | 0.197  | 0.336  | 0.162  |        |
| 209     | 0.393                           | -0.523 | 0.107  | -0.486 | 0.540  | -0.280 | 0.298                                  | -0.220 | 0.234  | -0.217 | -0.231 | -0.152 |        |
| 213     | 0.231                           | -0.116 | -0.533 | -0.070 | 0.894  | -0.162 | 0.078                                  | 0.119  | -0.351 | 0.125  | 0.007  | -0.096 |        |
| 220     | -0.252                          | -0.098 | -0.189 | -0.142 | 1.270  | -0.181 | -0.426                                 | 0.106  | -0.076 | 0.026  | 0.316  | -0.146 |        |
| 234     | -0.211                          | -0.476 | -0.548 | -0.327 | 0.460  | -0.339 | -0.408                                 | -0.286 | -0.426 | -0.177 | -0.422 | -0.322 |        |
| 236     | -0.270                          | -0.233 | -0.385 | -0.198 | 1.291  | -0.212 | -0.403                                 | 0.014  | -0.288 | 0.008  | 0.302  | -0.133 |        |
| 250     | -0.368                          | -0.422 | -0.291 | -0.445 | 0.927  | -0.124 | -0.595                                 | -0.267 | -0.207 | -0.323 | -0.025 | -0.146 |        |
| 98-13-4 | 0.297                           | -0.690 | 0.071  | -0.007 | 1.197  | -0.084 | 0.195                                  | -0.392 | 0.214  | 0.240  | 0.333  | 0.032  |        |
| V151    | 0.725                           | 0.153  | 0.186  | 0.285  | 1.626  | 0.528  | 0.532                                  | 0.352  | 0.200  | 0.439  | 0.596  | 0.554  |        |
| Assay 2 | 1                               | 0.080  | -0.270 | 0.374  | -0.161 | 0.413  | -0.009                                 | -0.098 | -0.232 | -0.002 | -0.199 | -0.238 | -0.101 |
|         | 3                               | 0.148  | -0.123 | -0.166 | -0.001 | 0.424  | -0.008                                 | 0.008  | -0.049 | -0.376 | -0.007 | -0.188 | -0.057 |

| Sample | Individual analysis (per assay) |        |        |        |       |        | Analysis on total dataset (72 samples) |        |        |        |        |        |
|--------|---------------------------------|--------|--------|--------|-------|--------|----------------------------------------|--------|--------|--------|--------|--------|
|        | ANS                             | CHS    | DFR    | F3H    | F3'H  | FLS    | ANS                                    | CHS    | DFR    | F3H    | F3'H   | FLS    |
| 6      | 0.241                           | 0.151  | 0.568  | 0.089  | 0.698 | 0.269  | 0.084                                  | 0.193  | 0.288  | 0.058  | 0.094  | 0.186  |
| 7      | 0.211                           | 0.046  | 0.402  | 0.262  | 0.775 | -0.034 | 0.083                                  | 0.127  | 0.102  | 0.258  | 0.131  | -0.070 |
| 9      | 0.072                           | -0.164 | 0.432  | -0.127 | 0.646 | -0.055 | -0.129                                 | -0.153 | 0.013  | -0.193 | -0.066 | -0.168 |
| 10     | 0.375                           | 0.422  | 0.537  | 0.176  | 0.820 | 0.354  | 0.157                                  | 0.392  | 0.302  | 0.081  | 0.191  | 0.204  |
| 12     | 0.214                           | -0.076 | 0.097  | 0.057  | 0.505 | 0.176  | 0.065                                  | -0.010 | -0.159 | 0.041  | -0.113 | 0.112  |
| 13     | 0.254                           | -0.067 | 0.192  | 0.093  | 0.589 | 0.005  | 0.135                                  | 0.022  | 0.051  | 0.099  | 0.045  | -0.032 |
| 14     | 0.326                           | -0.074 | 0.644  | -0.019 | 0.434 | 0.097  | 0.154                                  | -0.025 | 0.223  | -0.047 | -0.201 | 0.020  |
| 16     | 0.291                           | 0.001  | 0.071  | 0.290  | 0.423 | 0.185  | 0.138                                  | 0.064  | -0.206 | 0.266  | -0.198 | 0.122  |
| 17     | 0.180                           | -0.027 | 0.021  | 0.166  | 0.994 | 0.332  | 0.017                                  | 0.023  | -0.267 | 0.132  | 0.268  | 0.249  |
| 18     | 0.244                           | -0.373 | 0.231  | -0.317 | 0.150 | -0.106 | 0.013                                  | -0.374 | -0.154 | -0.396 | -0.505 | -0.238 |
| 19     | 0.209                           | -0.145 | -0.302 | 0.061  | 0.117 | -0.145 | 0.093                                  | -0.044 | -0.406 | 0.078  | -0.416 | -0.164 |
| 21     | -0.154                          | 0.041  | 0.329  | -0.135 | 0.833 | 0.049  | -0.317                                 | 0.065  | 0.012  | -0.179 | 0.145  | -0.048 |

| Sample | Individual analysis (per assay) |        |        |        |        |        | Analysis on total dataset (72 samples) |        |        |        |        |        |
|--------|---------------------------------|--------|--------|--------|--------|--------|----------------------------------------|--------|--------|--------|--------|--------|
|        | ANS                             | CHS    | DFR    | F3H    | F3'H   | FLS    | ANS                                    | CHS    | DFR    | F3H    | F3'H   | FLS    |
| 22     | 0.305                           | 0.178  | 0.634  | 0.180  | 0.248  | 0.176  | 0.176                                  | 0.245  | 0.440  | 0.171  | -0.220 | 0.121  |
| 24     | -0.194                          | -0.769 | 0.083  | -0.424 | 0.098  | -0.289 | -0.366                                 | -0.720 | -0.242 | -0.464 | -0.519 | -0.380 |
| 25     | -0.328                          | 0.011  | -0.149 | -0.006 | 0.850  | -0.150 | -0.453                                 | 0.064  | -0.321 | -0.028 | 0.190  | -0.212 |
| 26     | 0.204                           | -0.108 | 0.328  | -0.095 | 0.276  | 0.155  | -0.016                                 | -0.119 | 0.023  | -0.182 | -0.339 | 0.013  |
| 28     | 0.124                           | -0.089 | 0.629  | -0.053 | 0.349  | 0.150  | -0.091                                 | -0.098 | 0.223  | -0.139 | -0.293 | 0.011  |
| 29     | -0.249                          | -0.112 | 0.111  | 0.103  | 0.101  | -0.234 | -0.273                                 | 0.050  | 0.000  | 0.180  | -0.332 | -0.189 |
| 32     | 0.229                           | -0.034 | -0.268 | 0.329  | 0.839  | 0.195  | 0.093                                  | 0.042  | -0.409 | 0.314  | 0.192  | 0.142  |
| 33     | -0.018                          | 0.023  | 0.321  | 0.068  | 0.513  | 0.024  | -0.157                                 | 0.077  | 0.064  | 0.045  | -0.081 | -0.043 |
| 36     | 0.000                           | -0.070 | 0.528  | -0.165 | 0.502  | -0.075 | -0.138                                 | -0.013 | 0.252  | -0.179 | -0.074 | -0.139 |
| 38     | 0.282                           | -0.270 | 0.134  | -0.087 | -0.072 | -0.203 | 0.149                                  | -0.177 | -0.113 | -0.077 | -0.585 | -0.233 |
| 66     | 0.432                           | 0.645  | 0.940  | 0.638  | 1.406  | 0.583  | 0.261                                  | 0.672  | 0.456  | 0.589  | 0.631  | 0.495  |
| 67     | 0.223                           | 0.103  | 0.870  | -0.034 | 0.609  | 0.267  | -0.003                                 | 0.086  | 0.336  | -0.122 | -0.113 | 0.125  |

| Sample  | Individual analysis (per assay) |        |        |        |        |        | Analysis on total dataset (72 samples) |        |        |        |        |        |        |
|---------|---------------------------------|--------|--------|--------|--------|--------|----------------------------------------|--------|--------|--------|--------|--------|--------|
|         | ANS                             | CHS    | DFR    | F3H    | F3'H   | FLS    | ANS                                    | CHS    | DFR    | F3H    | F3'H   | FLS    |        |
| 83      | 0.519                           | 0.475  | 1.169  | 0.534  | 1.049  | 0.597  | 0.345                                  | 0.512  | 0.627  | 0.492  | 0.326  | 0.512  |        |
| 168     | 0.168                           | 0.024  | 0.120  | -0.035 | 0.630  | 0.253  | -0.042                                 | 0.024  | -0.239 | -0.108 | -0.090 | 0.126  |        |
| 180     | 0.202                           | -0.803 | 0.713  | -0.555 | -0.516 | -0.381 | 0.113                                  | -0.647 | 0.333  | -0.485 | -0.942 | -0.363 |        |
| Assay 3 | 48                              | -0.384 | 0.040  | -0.064 | 0.230  | 0.277  | -0.282                                 | -0.304 | 0.168  | -0.205 | 0.121  | 0.184  | -0.043 |
|         | 50                              | 0.048  | 0.049  | 0.397  | 0.333  | 0.118  | 0.187                                  | 0.119  | 0.200  | 0.077  | 0.242  | 0.030  | 0.423  |
|         | 57                              | -0.356 | -0.724 | 0.556  | -0.440 | -1.301 | -0.603                                 | -0.286 | -0.561 | 0.129  | -0.518 | -1.188 | -0.350 |
|         | 58                              | 0.027  | -0.241 | -0.303 | 0.192  | -0.459 | -0.112                                 | 0.121  | -0.054 | -0.462 | 0.130  | -0.466 | 0.161  |
|         | 59                              | 0.273  | 0.319  | 0.420  | 0.362  | 0.154  | -0.040                                 | 0.257  | 0.375  | 0.130  | 0.187  | 0.026  | 0.129  |
|         | 68                              | 0.362  | 0.036  | 0.284  | 0.349  | -0.340 | -0.008                                 | 0.344  | 0.114  | -0.049 | 0.184  | -0.433 | 0.166  |
|         | 71                              | 0.003  | 0.239  | 0.138  | 0.462  | 0.379  | -0.361                                 | 0.009  | 0.305  | -0.084 | 0.290  | 0.230  | -0.170 |
|         | 73                              | -0.087 | -0.412 | 0.060  | -0.149 | -0.520 | -0.412                                 | -0.075 | -0.310 | -0.217 | -0.288 | -0.587 | -0.214 |
| 79      | -0.116                          | -0.400 | 0.034  | 0.104  | -0.762 | -0.448 | 0.000                                  | -0.193 | -0.191 | 0.060  | -0.717 | -0.144 |        |

| Sample | Individual analysis (per assay) |        |        |        |        |        | Analysis on total dataset (72 samples) |        |        |        |        |        |
|--------|---------------------------------|--------|--------|--------|--------|--------|----------------------------------------|--------|--------|--------|--------|--------|
|        | ANS                             | CHS    | DFR    | F3H    | F3'H   | FLS    | ANS                                    | CHS    | DFR    | F3H    | F3'H   | FLS    |
| 80     | -0.008                          | -0.009 | 0.100  | 0.447  | 0.089  | -0.239 | 0.064                                  | 0.143  | -0.151 | 0.349  | 0.003  | 0.016  |
| 84     | -0.027                          | -0.095 | 0.014  | -0.033 | -0.106 | -0.051 | -0.177                                 | -0.179 | -0.259 | -0.348 | -0.327 | -0.036 |
| 95     | 0.046                           | -0.214 | 0.288  | -0.153 | -0.210 | -0.240 | 0.025                                  | -0.145 | -0.078 | -0.316 | -0.343 | -0.076 |
| 100    | 0.261                           | -0.082 | 0.139  | 0.312  | -0.063 | -0.273 | 0.296                                  | 0.054  | -0.173 | 0.201  | -0.164 | -0.036 |
| 104    | -0.281                          | -0.309 | -0.217 | 0.093  | -0.481 | -0.141 | -0.089                                 | -0.039 | -0.306 | 0.116  | -0.400 | 0.214  |
| 108    | -0.120                          | -0.211 | 0.578  | -0.168 | -0.236 | -0.168 | -0.127                                 | -0.136 | 0.112  | -0.324 | -0.375 | -0.002 |
| 109    | -0.168                          | 0.145  | 0.269  | 0.372  | 0.366  | -0.370 | -0.137                                 | 0.239  | -0.064 | 0.226  | 0.198  | -0.160 |
| 111    | 0.282                           | 0.443  | 0.263  | 0.470  | 0.178  | 0.255  | 0.219                                  | 0.447  | -0.040 | 0.244  | -0.001 | 0.362  |
| 117    | -0.032                          | -0.307 | 0.388  | 0.141  | -0.232 | -0.258 | 0.057                                  | -0.128 | 0.078  | 0.072  | -0.267 | 0.014  |
| 173    | -0.293                          | -0.554 | 0.667  | -0.499 | -0.784 | -0.541 | -0.198                                 | -0.368 | 0.227  | -0.545 | -0.781 | -0.262 |
| 174    | 0.104                           | -0.055 | 0.344  | 0.253  | -0.251 | -0.169 | 0.121                                  | 0.047  | 0.017  | 0.112  | -0.335 | 0.033  |
| 176    | -0.246                          | -0.060 | 0.307  | -0.044 | -0.061 | -0.201 | -0.239                                 | 0.021  | -0.131 | -0.195 | -0.230 | -0.025 |
