# Supplementary material for: How to perform RT-qPCR accurately in plant species? A case study on flower colour gene expression in an azalea (Rhododendron simsii hybrids) mapping population
Source: PubMed Central journal article supplement (PMC3698002; doi:10.1186/1471-2199-14-13), 2013-06-24
Supplement: 1471-2199-14-13-S5.pdf [file 1471-2199-14-13-S5.pdf]

| <b>Colour</b> | <b>Sample</b> | <b>ANS</b> | <b>CHS</b> | <b>DFR</b> | <b>F3H</b> | <b>F3'H</b> | <b>FLS</b> |
|---------------|---------------|------------|------------|------------|------------|-------------|------------|
| 0             | 1             | 1.02       | 1.10       | 3.55       | 1.01       | 3.21        | 1.01       |
| 0             | 10            | 1.95       | 1.98       | 2.04       | 2.03       | 1.81        | 1.87       |
| 0             | 14            | 2.49       | 1.60       | 7.79       | 1.06       | 1.59        | 1.15       |
| 0             | 16            | 1.05       | 1.05       | 1.17       | 1.14       | 1.11        | 1.01       |
| 0             | 21            | 1.40       | 1.70       | 1.30       | 1.58       | 1.65        | 1.57       |
| 0             | 24            | 1.19       | 6.24       | 3.12       | 3.70       | 6.20        | 2.52       |
| 0             | 33            | 1.24       | 1.12       | 1.64       | 1.14       | 1.27        | 1.04       |
| 0             | 36            | 6.39       | 4.90       | 6.06       | 3.22       | 1.83        | 4.86       |
| 0             | 48            | 1.29       | 1.13       | 1.10       | 1.03       | 1.00        | 1.00       |
| 0             | 80            | 1.02       | 1.08       | 1.04       | 1.12       | 1.17        | 1.25       |
| 0             | 84            | 1.05       | 1.73       | 1.02       | 2.27       | 1.64        | 1.17       |
| 0             | 95            | 1.26       | 1.18       | 1.17       | 1.08       | 1.18        | 1.04       |
| 0             | 100           | 1.14       | 1.26       | 1.07       | 1.67       | 1.21        | 1.16       |
| 0             | 111           | 1.07       | 1.07       | 1.70       | 1.45       | 1.55        | 1.28       |
| 0             | 117           | 1.05       | 1.17       | 1.77       | 1.23       | 1.56        | 1.02       |
| 0             | 153           | 1.07       | 1.07       | 1.04       | 1.02       | 1.13        | 1.04       |
| 0             | 158           | 1.32       | 1.18       | 1.26       | 1.24       | 1.56        | 1.11       |
| 0             | 164           | 1.41       | 1.60       | 1.23       | 1.62       | 1.41        | 1.25       |
| 0             | 168           | 1.01       | 1.13       | 3.12       | 1.10       | 2.86        | 1.01       |
| 0             | 174           | 1.25       | 1.01       | 1.53       | 1.43       | 1.09        | 1.01       |
| 0             | 176           | 2.06       | 2.31       | 1.43       | 3.66       | 3.67        | 1.49       |
| 0             | 179           | 1.42       | 1.18       | 1.22       | 1.07       | 1.07        | 1.22       |
| 0             | 213           | 1.29       | 1.07       | 1.45       | 1.38       | 1.42        | 1.06       |
| 1             | 3             | 1.02       | 1.17       | 1.21       | 1.00       | 1.29        | 1.01       |
| 1             | 6             | 1.20       | 1.62       |            | 1.24       | 1.17        | 1.42       |
| 1             | 12            | 1.18       | 1.48       | 1.69       | 1.42       | 1.80        | 1.18       |
| 1             | 17            | 1.09       | 1.17       | 1.61       | 1.25       | 1.20        | 1.13       |
| 1             | 18            | 1.62       | 1.07       | 1.13       | 1.12       | 1.10        | 1.04       |
| 1             | 25            | 2.46       | 1.11       | 1.39       | 1.48       | 1.11        | 1.29       |
| 1             | 28            | 1.11       | 1.86       | 1.29       | 2.40       | 1.09        | 2.03       |
| 1             | 50            | 1.25       | 1.25       | 2.07       | 1.13       | 1.31        | 1.33       |
| 1             | 57            | 3.61       | 2.69       | 3.04       | 3.23       |             | 2.24       |
| 1             | 58            | 1.04       | 1.27       | 1.15       | 1.27       | 1.13        | 1.16       |
| 1             | 59            | 2.50       | 1.68       | 2.51       | 1.25       | 1.67        | 1.78       |
| 1             | 68            | 1.01       | 1.15       | 1.54       | 1.13       | 1.66        | 1.22       |
| 1             | 83            | 1.36       | 1.49       | 1.07       | 1.63       | 3.36        | 1.42       |
| 1             | 104           | 1.18       | 1.03       | 2.38       | 1.06       | 1.39        | 1.02       |
| 1             | 108           | 1.86       | 1.53       | 1.67       | 1.28       | 1.11        | 1.44       |
| 1             | 109           | 1.61       | 1.03       | 1.11       | 1.59       | 1.30        | 1.47       |
| 1             | 131           | 1.11       | 1.99       | 1.13       | 2.70       | 10.12       | 1.43       |
| 1             | 132           | 1.39       | 1.16       | 1.07       | 1.03       | 1.82        | 1.28       |
| 1             | 180           | 1.26       | 1.12       | 1.14       | 1.08       | 2.50        | 1.40       |
| 1             | 191           | 1.44       | 1.25       | 1.30       | 1.37       | 1.23        | 1.34       |
| 1             | 220           | 1.08       | 1.13       | 1.06       | 1.31       | 1.06        | 1.01       |
| 1             | 250           | 2.79       | 1.67       | 2.10       | 2.03       | 1.59        | 1.46       |

| <b>Colour</b> | <b>Sample</b> | <b>ANS</b> | <b>CHS</b> | <b>DFR</b> | <b>F3H</b> | <b>F3'H</b> | <b>FLS</b> |
|---------------|---------------|------------|------------|------------|------------|-------------|------------|
| 2             | 7             | 1.03       | 1.17       |            | 1.19       | 1.10        | 1.12       |
| 2             | 9             | 1.75       | 1.83       | 1.10       | 1.88       | 3.52        | 1.20       |
| 2             | 13            | 1.71       | 1.43       | 1.56       | 1.32       | 1.96        | 1.08       |
| 2             | 22            | 1.83       | 1.12       | 3.65       | 1.43       | 8.03        | 1.37       |
| 2             | 26            | 1.35       | 1.94       | 2.07       | 1.83       | 2.35        | 1.34       |
| 2             | 29            | 1.48       | 1.22       | 1.76       | 1.29       | 1.51        | 1.33       |
| 2             | 32            | 1.16       | 1.16       | 1.38       | 1.32       | 2.12        | 1.12       |
| 2             | 38            | 1.02       | 1.04       | 1.16       | 1.05       | 1.22        | 1.13       |
| 2             | 66            | 1.77       | 1.39       | 1.79       | 1.25       | 1.05        | 1.46       |
| 2             | 67            | 1.07       | 1.41       | 1.29       | 1.35       | 1.98        | 1.13       |
| 2             | 71            | 1.10       | 1.00       | 1.03       | 1.19       | 1.07        | 1.01       |
| 2             | 73            | 1.45       | 1.60       | 1.56       | 1.99       | 2.44        | 2.22       |
| 2             | 79            | 1.39       | 1.12       | 2.07       | 1.17       | 1.82        | 1.40       |
| 2             | 173           | 1.59       | 1.33       | 1.38       | 1.17       | 1.27        | 1.07       |
| 2             | 185           | 1.54       | 1.05       | 1.08       | 1.22       | 1.28        | 1.33       |
| 2             | 197           | 1.62       | 1.12       | 1.31       | 1.17       | 1.41        | 1.13       |
| 2             | 201           | 1.11       | 1.11       | 1.37       | 1.18       | 1.09        | 1.37       |
| 2             | 209           | 1.21       | 2.51       | 2.83       | 1.96       | 1.86        | 1.09       |
| 2             | 234           | 11.63      | 7.87       | 3.77       | 8.07       | 14.11       | 3.25       |
| 3             | 19            | 1.23       | 1.10       |            | 1.16       | 1.17        | 1.14       |
| 3             | 102           | 1.20       | 1.58       | 1.38       | 1.31       | 1.36        | 1.12       |
| 3             | 121           | 2.85       | 1.12       | 1.08       | 1.06       | 1.83        | 1.44       |
| 3             | 161           | 1.18       | 1.24       | 1.30       | 1.09       | 1.48        | 1.35       |
| 3             | 190           | 1.06       | 1.57       | 1.07       | 2.41       | 2.25        | 1.35       |
| 3             | 236           | 1.57       | 1.37       | 1.14       | 1.30       | 1.13        | 1.37       |
| 3             | 98-13-4       | 1.18       | 1.13       | 1.06       | 1.01       | 1.01        | 1.05       |
| 3             | V151          | 1.41       | 1.02       | 1.53       | 1.06       | 1.39        | 1.01       |
|               | <b>Mean</b>   | 1.64       | 1.56       | 1.76       | 1.58       | 2.04        | 1.36       |
|               | <b>Median</b> | 1.26       | 1.18       | 1.38       | 1.26       | 1.41        | 1.22       |
|               | <b>Min</b>    | 1.01       | 1.00       | 1.02       | 1.00       | 1.00        | 1.00       |
|               | <b>Max</b>    | 11.63      | 7.87       | 7.79       | 8.07       | 14.11       | 4.86       |
